# Supplementary material for: Assessment of Professional Competency and Its Related Factors in Cardiology Interns Using a Self-Assessment Method
Source: Research Square preprint supplement (doi:10.21203/rs.3.rs-6321710/v1), 2025-05-08
Supplement: Supplementary file 1 [file 091944a40fac1054af41144d.docx]

| **Table 1. Comparison ability fields between the baseline features of study participants** | | | | | | | | | | | | | | | | | | | | | |
| --- | --- | --- | --- | --- | --- | --- | --- | --- | --- | --- | --- | --- | --- | --- | --- | --- | --- | --- | --- | --- | --- |
|  | |  |  | Social field | | | History and physical examination area | | | The scope of differential diagnosis | | | Treatment area | | | Practical skills area | | | Total ability field | | |
| Count | Percent | Mean | SD | *P*-value | Mean | SD | *P*-value | Mean | SD | *P*-value | Mean | SD | *P*-value | Mean | SD | *P*-value | Mean | SD | *P*-value |
| Age | <=25 | 97 | 63.4% | 7.86 | 1.35 | 0.935† | 92.31 | 14.02 | 0.658† | 21.87 | 4.10 | 0.593† | 64.57 | 11.99 | 0.869† | 56.65 | 9.58 | 0.845† | 243.25 | 36.35 | 0.997† |
| >25 | 56 | 36.6% | 7.88 | 1.50 |  | 91.27 | 13.97 |  | 22.23 | 4.03 |  | 64.93 | 14.64 |  | 56.96 | 9.62 |  | 243.27 | 39.02 |  |
| Sex | Male | 74 | 48.4% | 7.89 | 1.43 | 0.804† | 91.93 | 13.43 | 0.997† | 22.22 | 3.77 | 0.526† | 66.08 | 12.80 | 0.203† | 57.27 | 9.29 | 0.529† | 245.39 | 35.12 | 0.494† |
| Female | 79 | 51.6% | 7.84 | 1.38 |  | 91.92 | 14.53 |  | 21.80 | 4.34 |  | 63.41 | 13.09 |  | 56.29 | 9.86 |  | 241.25 | 39.21 |  |
| Marital Status | Single | 127 | 83.0% | 7.90 | 1.41 | 0.498† | 92.13 | 13.85 | 0.700† | 22.27 | 3.83 | 0.072† | 65.00 | 12.66 | 0.528† | 57.01 | 9.51 | 0.489† | 244.30 | 36.33 | 0.445† |
| Married | 26 | 17.0% | 7.69 | 1.38 |  | 90.96 | 14.72 |  | 20.69 | 4.95 |  | 63.23 | 14.61 |  | 55.58 | 9.95 |  | 238.15 | 41.67 |  |
| Habitancy | With family | 94 | 61.4% | 7.80 | 1.42 | 0.489‡ | 91.54 | 14.53 | 0.652‡ | 21.79 | 4.31 | 0.698‡ | 64.69 | 12.91 | 0.959‡ | 57.00 | 9.83 | 0.882‡ | 242.82 | 39.04 | 0.897‡ |
| Dormitory | 26 | 17.0% | 7.77 | 1.21 |  | 94.23 | 10.88 |  | 22.19 | 3.45 |  | 65.27 | 11.15 |  | 56.85 | 8.90 |  | 246.31 | 29.05 |  |
| Student House | 33 | 21.6% | 8.12 | 1.49 |  | 91.21 | 14.65 |  | 22.45 | 3.86 |  | 64.27 | 14.77 |  | 56.03 | 9.57 |  | 242.09 | 38.50 |  |
| Rotation number | 1 | 18 | 11.8% | 7.72 | 1.18 | 0.893‡ | 90.44 | 14.01 | 0.165‡ | 20.67 | 3.90 | 0.163‡ | **64.83**ab | **14.21** | **0.043**§ | 56.39 | 9.85 | 0.364‡ | 240.06 | 39.76 | 0.115‡ |
| 2-5 | 74 | 48.4% | 7.86 | 1.46 |  | 90.12 | 15.10 |  | 21.80 | 4.40 |  | **62.20**a | **14.52** |  | 55.76 | 10.33 |  | 237.74 | 41.25 |  |
| >5 Good | 61 | 39.9% | 7.90 | 1.41 |  | 94.56 | 12.20 |  | 22.64 | 3.60 |  | **67.69**b | **9.81** |  | 58.10 | 8.46 |  | 250.89 | 29.86 |  |
| Total grade point average until the end of the internship | <14 (Poor) | 5 | 3.3% | 7.00 | 1.41 | 0.123‡ | 85.80 | 12.54 | 0.313‡ | 20.00 | 2.24 | 0.139‡ | 62.40 | 10.16 | 0.558‡ | 57.40 | 6.58 | 0.954‡ | 232.60 | 29.77 | 0.450‡ |
| [14-17) (Intermediate) | 110 | 71.9% | 7.79 | 1.31 |  | 91.35 | 14.42 |  | 21.75 | 4.24 |  | 64.15 | 13.44 |  | 56.62 | 9.43 |  | 241.65 | 38.23 |  |
| 17-20 (Top) | 38 | 24.8% | 8.18 | 1.61 |  | 94.39 | 12.61 |  | 23.00 | 3.56 |  | 66.61 | 11.98 |  | 57.11 | 10.44 |  | 249.29 | 35.08 |  |
| Comprehensive test score of the preliminary education course | <100 (Poor) | 9 | 5.9% | 8.11 | 1.36 | 0.636‡ | 85.00 | 13.29 | 0.265‡ | 20.44 | 2.79 | 0.379‡ | 59.67 | 14.73 | 0.321‡ | 55.44 | 8.28 | 0.914‡ | 228.67 | 35.89 | 0.408‡ |
| 100-139 (Intermediate) | 109 | 71.2% | 7.90 | 1.37 |  | 91.99 | 14.02 |  | 21.95 | 4.10 |  | 64.45 | 13.02 |  | 56.85 | 9.65 |  | 243.15 | 37.28 |  |
| 140-200 (Top) | 35 | 22.9% | 7.69 | 1.51 |  | 93.51 | 13.79 |  | 22.54 | 4.22 |  | 66.77 | 12.33 |  | 56.83 | 9.85 |  | 247.34 | 37.45 |  |
| Comprehensive test score before entering the internship course | <100 (Poor) | 20 | 13.1% | 7.85 | 1.35 | 0.999‡ | **87.35ab** | **13.58** | **0.035**‡ | 20.60 | 4.31 | 0.254‡ | **60.00**a | **17.09** | **0.040**‡ | **54.65**ab | **10.31** | **0.037**‡ | **230.45**ab | **41.76** | **0.032**‡ |
| 100-139 (Intermediate) | 112 | 73.2% | 7.87 | 1.36 |  | **93.69b** | **13.94** |  | 22.23 | 4.01 |  | **66.30**b | **11.98** |  | **57.92**b | **9.18** |  | **248.01**b | **35.77** |  |
| 140-200 (Top) | 21 | 13.7% | 7.86 | 1.71 |  | **86.90a** | **12.75** |  | 22.10 | 4.05 |  | **60.62**ab | **12.32** |  | **52.62**a | **9.86** |  | **230.10**a | **36.06** |  |
| Total |  | 153 | 100% | 7.86 | 1.40 |  | 91.93 | 13.96 |  | 22.00 | 4.07 |  | 64.70 | 12.98 |  | 56.76 | 9.57 |  | 243.25 | 37.22 |  |
| Abbreviations: SD, standard deviation.  Count, precent, mean and standard deviation are presented.  †Independent Samples T-Test was used.  ‡One-way ANOVA test followed by LSD’s test was used.  §Welch One-way ANOVA test followed by Games-Howell’s test was used.  Means with same superscript letters are not significantly different (p > 0.05).  Significant values are shown in bold. | | | | | | | | | | | | | | | | | | | | | |

| **Table 2. Descriptive statistics of Standardized Influencing Factors and Ability Fields based on study participants** | | | | | | | | |
| --- | --- | --- | --- | --- | --- | --- | --- | --- |
|  | Mean | SD | Low | | Moderate | | High | |
|  | Count | Percent | Count | Percent | Count | Percent |
| Social field (Standardized) | 73.28 | 17.51 | 2 | 1.3% | 56 | 36.6% | 95 | 62.1% |
| History and physical examination area (Standardized) | 66.93 | 13.96 | 2 | 1.3% | 66 | 43.1% | 85 | 55.6% |
| The scope of differential diagnosis (Standardized) | 66.67 | 16.94 | 5 | 3.3% | 55 | 35.9% | 93 | 60.8% |
| Treatment area (Standardized) | 60.13 | 17.08 | 10 | 6.5% | 83 | 54.2% | 60 | 39.2% |
| Practical skills area (Standardized) | 63.69 | 14.95 | 4 | 2.6% | 80 | 52.3% | 69 | 45.1% |
| Total Ability Field (Standardized) | 64.43 | 13.68 | 3 | 2.0% | 78 | 51.0% | 72 | 47.1% |
| Curriculum area (Standardized) | 62.68 | 17.91 | 9 | 5.9% | 79 | 51.6% | 65 | 42.5% |
| The field related to the student (Standardized) | 56.32 | 16.11 | 7 | 4.6% | 90 | 58.8% | 56 | 36.6% |
| Educational facilities area (Standardized) | 66.94 | 23.11 | 12 | 7.8% | 41 | 26.8% | 100 | 65.4% |
| The field related to the teacher (Standardized) | 72.11 | 22.28 | 9 | 5.9% | 34 | 22.2% | 110 | 71.9% |
| Total Influencing Factors (Standardized) | 63.84 | 16.20 | 7 | 4.6% | 83 | 54.2% | 63 | 41.2% |
| Abbreviations: SD, standard deviation.  Mean, standard deviation, count and percent are presented. | | | | | | | | |

| **Table 3. Univariate linear regression analysis to evaluate associations between baseline features of study participants and ability fields** | | | | | | | | |
| --- | --- | --- | --- | --- | --- | --- | --- | --- |
|  |  |  | Social field | History and physical examination area | The scope of differential diagnosis | Treatment area | Practical skills area | Total Ability Field |
| Age (Ref: ≤25 Yesrs old) | >25 years old | β | 0.019 | -1.041 | 0.366 | 0.362 | 0.315 | 0.020 |
|  |  | 95% CI | -0.447, 0.485 | -5.683, 3.600 | -0.985, 1.717 | -3.956, 4.679 | -2.868, 3.497 | -12.363, 12.404 |
|  |  | *P*-value | 0.935 | 0.658 | 0.593 | 0.869 | 0.845 | 0.997 |
| Sex (Ref: Male) | Female | β | -0.056 | -0.008 | -0.419 | -2.676 | -0.979 | -4.139 |
|  |  | 95% CI | 7.569, 8.215 | -4.485, 4.469 | -1.721, 0.883 | -6.816, 1.464 | -4.043, 2.085 | -16.057, 7.779 |
|  |  | *P*-value | 0.804 | 0.997 | 0.526 | 0.203 | 0.529 | 0.494 |
| Marital Status (Ref: Single) | Married | β | -0.205 | -1.164 | -1.575 | -1.769 | -1.431 | -6.145 |
|  |  | 95% CI | -0.802, 0.391 | -7.118, 4.790 | -3.292, 0.141 | -7.300, 3.761 | -5.507, 2.645 | -21.997, 9.706 |
|  |  | *P*-value | 0.498 | 0.700 | 0.072 | 0.528 | 0.489 | 0.445 |
| Habitancy (Ref: With family) | Dormitory | β | -0.029 | 2.688 | 0.405 | 0.578 | -0.154 | 9.706 |
| 95% CI | -0.643, 0.586 | -3.447, 8.823 | -1.382, 2.192 | -5.140, 6.296 | -4.367, 4.059 | -12.904, 19.881 |
|  |  | *P*-value | 0.927 | 0.907 | 0.655 | 0.842 | 0.943 | 0.675 |
|  | Student House | β | 0.323 | -0.330 | 0.667 | -0.419 | -0.970 | -0.728 |
|  |  | 95% CI | -0.238, 0.884 | -5.933, 5.272 | -0.965, 2.299 | -5.640, 4.803 | -4.817, 2.878 | -15.697, 14.241 |
|  |  | *P*-value | 0.257 | 0.907 | 0.420 | 0.874 | 0.619 | 0.924 |
| Rotation number (Ref: 2-5) | 1 | β | -0.143 | 0.323 | -1.131 | 2.631 | 0.632 | 2.312 |
| 95% CI | -0.874, 0.589 | -6.888, 7.533 | -3.230, 0.969 | -4.019, 9.280 | -4.336, 5.600 | -16.866, 21.491 |
|  |  | *P*-value | 0.701 | 0.930 | 0.289 | 0.436 | 0.802 | 0.812 |
|  | >5 | β | 0.037 | 4.436 | 0.842 | **5.486** | 2.342 | **13.142** |
|  |  | 95% CI | -0.445, 0.518 | -0.309, 9.180 | -0.540, 2.224 | **1.110, 9.861** | -0.927, 5.610 | **0.522, 25.762** |
|  |  | *P*-value | 0.880 | 0.067 | 0.230 | **0.014** | 0.159 | **0.041** |
| Total grade point average until the end of the internship (Ref: [14-17) (Intermediate) | <14 (Poor) | β  95% CI  *P*-value | -0.791  -2.047, 0.465  0.215 | -5.555  -18.153, 7.044  0.385 | -1.745  -5.395, 1.904  0.346 | -1.745  -13.503, 10.012  0.770 | 0.782  -7.917, 9.481  0.859 | -9.055  -42.728, 24.619  0.596 |
|  | 17-20 (Top) | β | 0.393 | 3.040 | 1.255 | 2.460 | 0.487 | 7.635 |
|  |  | 95% CI | -2.047, 0.465 | -2.144, 8.225 | -0.247, 2.756 | -2.379, 7.298 | -3.093, 4.067 | -6.222, 21.492 |
|  |  | *P*-value | 0.135 | 0.248 | 0.101 | 0.317 | 0.788 | 0.278 |
| Comprehensive test score of the preliminary education course (Ref: 100-139 (Intermediate)) | <100 (Poor) | β  95% CI  *P*-value | 0.212  -0.751, 1.175  0.589 | -6.991  -16.536, 2.554  0.150 | -1.510  -4.296, 1.277  0.286 | -4.783  -13.668, 4.102  0.289 | -1.409  -8.005, 5.187  0.674 | -14.480  -40.004, 11.043  0.264 |
|  | 140-200 (Top) | β | -0.213 | 1.523 | 0.589 | 2.322 | -0.025 | 4.196 |
|  |  | 95% CI | -0.753, 0.326 | -3.824, 6.871 | -0.972, 2.150 | -2.655, 7.299 | -3.720, 3.670 | -10.102, 18.494 |
|  |  | *P*-value | 0.436 | 0.574 | 0.457 | 0.358 | 0.990 | 0.563 |
| Comprehensive test score before entering the internship course (Ref: 100-139 (Intermediate) | <100 (Poor) | β  95% CI  *P*-value | -0.016  -0.692, 0.660  0.963 | -6.337  -12.929, .254  0.059 | -1.632  -3.577, 0.313  0.099 | **-6.304**  **-12.436, -0.171**  **0.044** | -3.270  -7.789, 1.249  0.155 | -17.559  -35.123, 0.005  0.050 |
|  | 140-200 (Top) | β | -0.009 | **-6.783** | -0.137 | -5.685 | **-5.301** | **-17.914** |
|  |  | 95% CI | -0.671, 0.653 | **-13.240, -0.326** | -2.042, 1.768 | -11.692, 0.323 | **-9.727, -0.874** | **-35.119, -0.708** |
|  |  | *P*-value | 0.979 | **0.040** | 0.887 | 0.063 | **0.019** | **0.041** |
| Abbreviations: β, beta coefficient; CI, confidence interval.  Values with significant level less than 0.05 are shown in bold.  These values are obtained from linear regression. | | | | | | | | |

| **Table 4. Linear regression model to evaluate associations between influencing factors and ability fields** | | | | | | | |
| --- | --- | --- | --- | --- | --- | --- | --- |
|  | Crude Model | | |  | Adjusted Model | | |
|  | β | 95% CI | *P*-value |  | β | 95% CI | *P*-value |
|  |  | sa | **Social field1** | | |  |  |
| Curriculum area | **0.061** | **0.031, 0.090** | **<0.001** |  | 0.039 | -0.003, 0.080 | 0.068 |
| The field related to the student | **0.121** | **0.006, 0.236** | **0.039** |  | -0.076 | -0.211, 0.058 | 0.263 |
| Educational facilities area | **0.136** | **0.058, 0.214** | **0.001** |  | 0.033 | -0.072, 0.139 | 0.535 |
| The field related to the teacher | **0.167** | **0.087, 0.247** | **<0.001** |  | **0.123** | **0.015, 0.231** | **0.026** |
|  | **History and physical examination area2** | | | | | | |
| Curriculum area | **0.601** | **0.303, 0.899** | **<0.001** |  | 0.424 | -0.004, 0.853 | 0.052 |
| The field related to the student | **1.721** | **0.593, 2.848** | **0.003** |  | 0.799 | -0.568, 2.167 | 0.250 |
| Educational facilities area | **1.010** | **0.217, 1.803** | **0.013** |  | -0.157 | -1.224, 0.909 | 0.771 |
| The field related to the teacher | **1.052** | **0.230, 1.874** | **0.013** |  | 0.370 | -0.742, 1.482 | 0.512 |
|  | **The scope of differential diagnosis3** | | | | | | |
| Curriculum area | 0.082 | -0.008, 0.173 | 0.073 |  | 0.040 | -0.091, 0.172 | 0.546 |
| The field related to the student | **0.421** | **0.089, 0.752** | **0.013** |  | 0.356 | -0.062, 0.774 | 0.094 |
| Educational facilities area | 0.125 | -0.110, 0.360 | 0.295 |  | -0.089 | -0.415, 0.237 | 0.590 |
| The field related to the teacher | 0.168 | -0.075, 0.411 | 0.173 |  | 0.078 | -0.262, 0.417 | 0.652 |
|  | **Treatment area4** | | | | | | |
| Curriculum area | **0.473** | **0.192, 0.754** | **0.001** |  | **0.432** | **0.043, 0.821** | **0.030** |
| The field related to the student | **1.611** | **0.563, 2.658** | **0.003** |  | **1.330** | **0.078, 2.583** | **0.038** |
| Educational facilities area | 0.627 | -0.119, 1.372 | 0.099 |  | -0.105 | -1.086, 0.876 | 0.833 |
| The field related to the teacher | 0.400 | -0.377, 1.178 | 0.311 |  | -0.542 | -1.546, 0.461 | 0.287 |
|  | **Practical skills area5** | | | | | | |
| Curriculum area | **0.501** | **0.302, 0.700** | **<0.001** |  | **0.440** | **0.156, 0.724** | **0.003** |
| The field related to the student | **1.229** | **0.458, 2.000** | **0.002** |  | 0.546 | -0.368, 1.459 | 0.239 |
| Educational facilities area | **0.689** | **0.145, 1.232** | **0.013** |  | -0.357 | -1.074, 0.360 | 0.327 |
| The field related to the teacher | **0.848** | **0.289, 1.407** | **0.003** |  | 0.269 | -0.466, 1.005 | 0.470 |
|  | **Total Ability Field6** | | | | | | |
| Curriculum area | **1.718** | **0.929, 2.506** | **<0.001** |  | **1.407** | **0.275, 2.538** | **0.015** |
| The field related to the student | **5.102** | **2.117, 8.087** | **0.001** |  | 2.870 | -0.738, 6.478 | 0.118 |
| Educational facilities area | **2.586** | **0.468, 4.704** | **0.017** |  | -0.747 | -3.560, 2.067 | 0.601 |
| The field related to the teacher | **2.636** | **0.438, 4.834** | **0.019** |  | 0.312 | -2.622, 3.247 | 0.834 |
| Abbreviations: β, beta coefficient; CI, confidence interval.  Significant values are shown in bold.  These values are obtained from linear regression by Enter method.  -Adjusted for variables with p-value < 0.3 based on Table 1.  1Adjusted for habitancy (with family/dormitory/student house), total grade point average until the end of the internship (poor/intermediate/top).  2Adjusted for rotation number (1/2-5/>5), total grade point average until the end of the internship (poor/intermediate/top), comprehensive test score of the preliminary education course (poor/intermediate/top), comprehensive test score before entering the internship course (poor/intermediate/top).  3Adjusted for marital status (single, married), rotation number (1/2-5/>5), total grade point average until the end of the internship (poor/intermediate/top), comprehensive test score of the preliminary education course (poor/intermediate/top), comprehensive test score before entering the internship course (poor/intermediate/top).  4Adjusted for sex (male, female), rotation number (1/2-5/>5), comprehensive test score of the preliminary education course (poor/intermediate/top), comprehensive test score before entering the internship course (poor/intermediate/top).  5Adjusted for rotation number (1/2-5/>5), comprehensive test score before entering the internship course (poor/ intermediate/top).  6Adjusted for rotation number (1/2-5/>5), total grade point average until the end of the internship (poor/intermediate/top), comprehensive test score of the preliminary education course (poor/intermediate/top), comprehensive test score before entering the internship course (poor/intermediate/top). | | | | | | | |
