# Supplementary material for: Assessment of Professional Competency and Its Related Factors in Cardiology Interns Using a Self-Assessment Method
Source: Research Square preprint supplement (doi:10.21203/rs.3.rs-6321710/v1), 2025-05-08
Supplement: Supplementary file 2 [file c96804855782e451f2fcfd63.docx]

**Section 1**

This section is designed to evaluate your perspective on your level of professional competence in the educational domain of cardiovascular diseases. Please read each of the following items carefully and indicate your opinion using the following scale: "Very Poor, Poor, Moderate, Good, Very Good."

| **How do you assess your ability in each of the following areas** | Very Poor | Poor | Moderate | Good | Very Good |
| --- | --- | --- | --- | --- | --- |
| 1. Demonstrating professional behavior and effective interaction with patients, their companions, and other members of the healthcare team in the educational domain of cardiovascular diseases |  |  |  |  |  |
| 1. Demonstrating responsibility, competence, and self-confidence in various clinical situations within the educational domain of cardiovascular diseases |  |  |  |  |  |
| 1. Taking a medical history from a patient presenting with chest pain |  |  |  |  |  |
| 1. Taking a medical history from a patient presenting with shortness of breath |  |  |  |  |  |
| 1. Taking a medical history from a patient presenting with a cough |  |  |  |  |  |
| 1. Taking a medical history from a patient presenting with hemoptysis |  |  |  |  |  |
| 1. Taking a medical history from a patient presenting with edema |  |  |  |  |  |
| 1. Taking a medical history from a patient presenting with palpitations |  |  |  |  |  |
| 1. Performing the necessary physical examinations on a patient presenting with chest pain |  |  |  |  |  |
| 1. Performing the necessary physical examinations on a patient presenting with shortness of breath |  |  |  |  |  |
| 1. Performing the necessary physical examinations on a patient presenting with a cough |  |  |  |  |  |
| 1. Performing the necessary physical examinations on a patient presenting with hemoptysis. |  |  |  |  |  |
| 1. Performing the necessary physical examinations on a patient presenting with edema |  |  |  |  |  |
| 1. Performing the necessary physical examinations on a patient presenting with palpitations |  |  |  |  |  |
| 1. Formulating relevant differential diagnoses for a patient presenting with chest pain |  |  |  |  |  |
| 1. Formulating relevant differential diagnoses for a patient presenting with shortness of breath |  |  |  |  |  |
| 1. Formulating relevant differential diagnoses for a patient presenting with a cough |  |  |  |  |  |
| 1. Formulating relevant differential diagnoses for a patient presenting with hemoptysis |  |  |  |  |  |
| 1. Formulating relevant differential diagnoses for a patient presenting with edema |  |  |  |  |  |
| 1. Formulating relevant differential diagnoses for a patient presenting with palpitations |  |  |  |  |  |
| 1. Clinical management and developing a diagnostic and therapeutic plan for a patient presenting with chest pain. |  |  |  |  |  |
| 1. Clinical management and developing a diagnostic and therapeutic plan for a patient presenting with shortness of breath |  |  |  |  |  |
| 1. Clinical management and developing a diagnostic and therapeutic plan for a patient presenting with a cough. |  |  |  |  |  |
| 1. Clinical management and developing a diagnostic and therapeutic plan for a patient presenting with hemoptysis |  |  |  |  |  |
| 1. Clinical management and developing a diagnostic and therapeutic plan for a patient presenting with edema |  |  |  |  |  |
| 1. Clinical management and developing a diagnostic and therapeutic plan for a patient presenting with palpitations |  |  |  |  |  |
| 1. Identifying clinical signs and symptoms in a patient with hyperlipidemia |  |  |  |  |  |
| 1. Identifying clinical signs and symptoms in a patient with atherosclerosis |  |  |  |  |  |
| 1. Identifying clinical signs and symptoms of arterial hypertension |  |  |  |  |  |
| 1. Identifying clinical signs and symptoms of hypertensive emergencies |  |  |  |  |  |
| 1. Identifying clinical signs and symptoms of coronary artery diseases (stable and unstable angina) |  |  |  |  |  |
| 1. Identifying clinical signs and symptoms of acute myocardial infarction |  |  |  |  |  |
| 1. Identifying clinical signs and symptoms of cor pulmonale |  |  |  |  |  |
| 1. Identifying clinical signs and symptoms of a patient with heart failure |  |  |  |  |  |
| 1. Identifying clinical signs and symptoms of a patient with valvular heart disease or valve stenosis. |  |  |  |  |  |
| 1. Identifying clinical signs and symptoms of common atrial arrhythmias (atrial fibrillation, atrial flutter) |  |  |  |  |  |
| 1. Identifying clinical signs and symptoms of life-threatening ventricular arrhythmias |  |  |  |  |  |
| 1. Identifying clinical signs and symptoms of shock |  |  |  |  |  |
| 1. Identifying clinical signs and symptoms of cardiac arrest |  |  |  |  |  |
| 1. Clinical management of a patient with hyperlipidemia |  |  |  |  |  |
| 1. Clinical management of a patient with atherosclerosis |  |  |  |  |  |
| 1. Clinical management of a patient with arterial hypertension |  |  |  |  |  |
| 1. Clinical management of hypertensive emergencies |  |  |  |  |  |
| 1. Clinical management of coronary artery diseases (stable and unstable angina) |  |  |  |  |  |
| 1. Clinical management of acute myocardial infarction |  |  |  |  |  |
| 1. Clinical management of cor pulmonale |  |  |  |  |  |
| 1. Clinical management of a patient with heart failure |  |  |  |  |  |
| 1. Clinical management of a patient with valvular heart disease or valve stenosis |  |  |  |  |  |
| 1. Clinical management of common atrial arrhythmias (atrial fibrillation, atrial flutter) |  |  |  |  |  |
| 1. Clinical management of life-threatening ventricular arrhythmias |  |  |  |  |  |
| 1. Clinical management of shock |  |  |  |  |  |
| 1. Clinical management of cardiac arrest |  |  |  |  |  |
| 1. Providing first aid to cardiovascular patients |  |  |  |  |  |
| 1. Adult cardiopulmonary resuscitation (basic and advanced) |  |  |  |  |  |
| 1. Obtaining a venous blood sample |  |  |  |  |  |
| 1. Arterial blood sampling for the measurement of arterial gases |  |  |  |  |  |
| 1. Establishing a peripheral venous access and administering fluids |  |  |  |  |  |
| 1. Properly implementing standard precautions to control infections, especially working in sterile conditions, such as handwashing |  |  |  |  |  |
| 1. Adhering to standard principles of patient transport in cardiovascular care |  |  |  |  |  |
| 1. Use of hemodynamic monitoring devices |  |  |  |  |  |
| 1. Performing an Electrocardiogram |  |  |  |  |  |
| 1. Interpreting standard Electrocardiogram readings and diagnosing abnormal findings |  |  |  |  |  |
| 1. Measuring arterial blood pressure |  |  |  |  |  |
| 1. Prescription writing for cardiovascular diseases |  |  |  |  |  |
| 1. Interpreting tests in cardiovascular patients |  |  |  |  |  |
| 1. Correct interpretation of chest X-rays in cardiovascular patients |  |  |  |  |  |
| 1. Patient education for cardiovascular patients (e.g., next appointment, how to take medications, warning signs and risks, etc.) |  |  |  |  |  |
| 1. Recording patient information in the medical record |  |  |  |  |  |

**Section 2**

The questions in this section are designed to "assess your views on the factors related to and influencing your professional competence in the field of cardiovascular disease education." Please carefully read each of the following questions and mark your response on the scale of "Highly effective, effective, moderately effective, slightly effective, not effective."

| **To what extent do each of the following factors influence your professional competence in the field of cardiovascular disease education?** | Not effective | Low effect | Average effect | Effective | Completely effective |
| --- | --- | --- | --- | --- | --- |
| 1. Level of interest in the cardiology field |  |  |  |  |  |
| 1. Timely presence of instructors in the department |  |  |  |  |  |
| 1. Appropriate interaction of instructors with students at the patient's bedside |  |  |  |  |  |
| 1. Adequate supervision of the clinical training process by the educational team |  |  |  |  |  |
| 1. Use of educational tools such as mannequins and electronic learning devices in the clinical environment |  |  |  |  |  |
| 1. Conducting in-department presentations by the student |  |  |  |  |  |
| 1. Frequency of patients visiting the department, clinic, and the variety of educational clinical cases |  |  |  |  |  |
| 1. Facilities and equipment in the clinical environment |  |  |  |  |  |
| 1. Pre-study before entering the clinical department |  |  |  |  |  |
| 1. Amount of time allocated for presence in the department |  |  |  |  |  |
| 1. Conducting educational rounds at the patient's bedside by instructors |  |  |  |  |  |
| 1. Conducting morning reports and grand rounds |  |  |  |  |  |
| 1. Conducting night rounds by residents on duty |  |  |  |  |  |
| 1. Conducting case-based learning (CBL) sessions during the rotation |  |  |  |  |  |
| 1. Completing the logbook |  |  |  |  |  |
| 1. Attendance in educational clinics |  |  |  |  |  |
| 1. Presence in the clinical department |  |  |  |  |  |
| 1. Attendance in the cardiac emergency department |  |  |  |  |  |
| 1. Attendance in the catheterization lab (cat lab) |  |  |  |  |  |
